# Supplementary material for: G2DC-PL+ A gridded 2 km daily climate dataset for the union of the Polish territory and the Vistula and Odra basins
Source: Copernicus journal article supplement (doi:10.5194/essd-2020-234), 2020-10-08
Supplement: Supplementary file 1 [file essd-2020-234-supplement.pdf]

Supplement of „G2DC-PL+ - a gridded 2 km daily climate dataset for the union of Polish territory and the Vistula and Odra basins”

Mikołaj Piniewski et al.

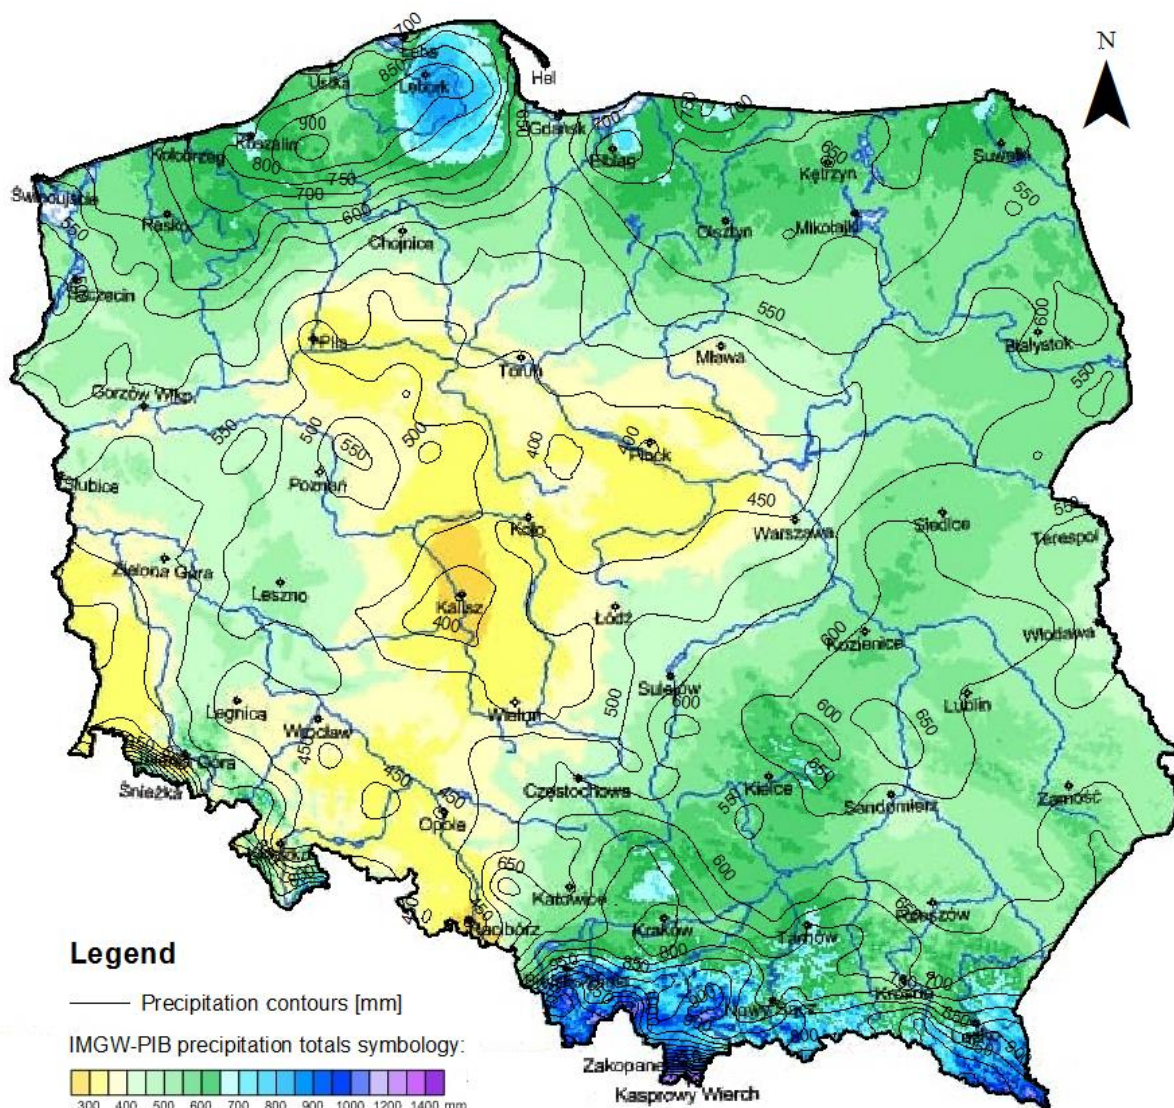

Figure S1. Comparison of the G2DC-PL+ mean annual precipitation contours with the IMGW-PIB mean annual precipitation map for 2015 (dry year). Contours are in 50 mm intervals. The IMGW-PIB map indicates also major rivers (blue lines) and major cities (labelled black circles). The IMGW-PIB map is adapted from the Climatic Maps of Poland<sup>1</sup>.

<sup>1</sup> <https://klimat.imgw.pl/pl>

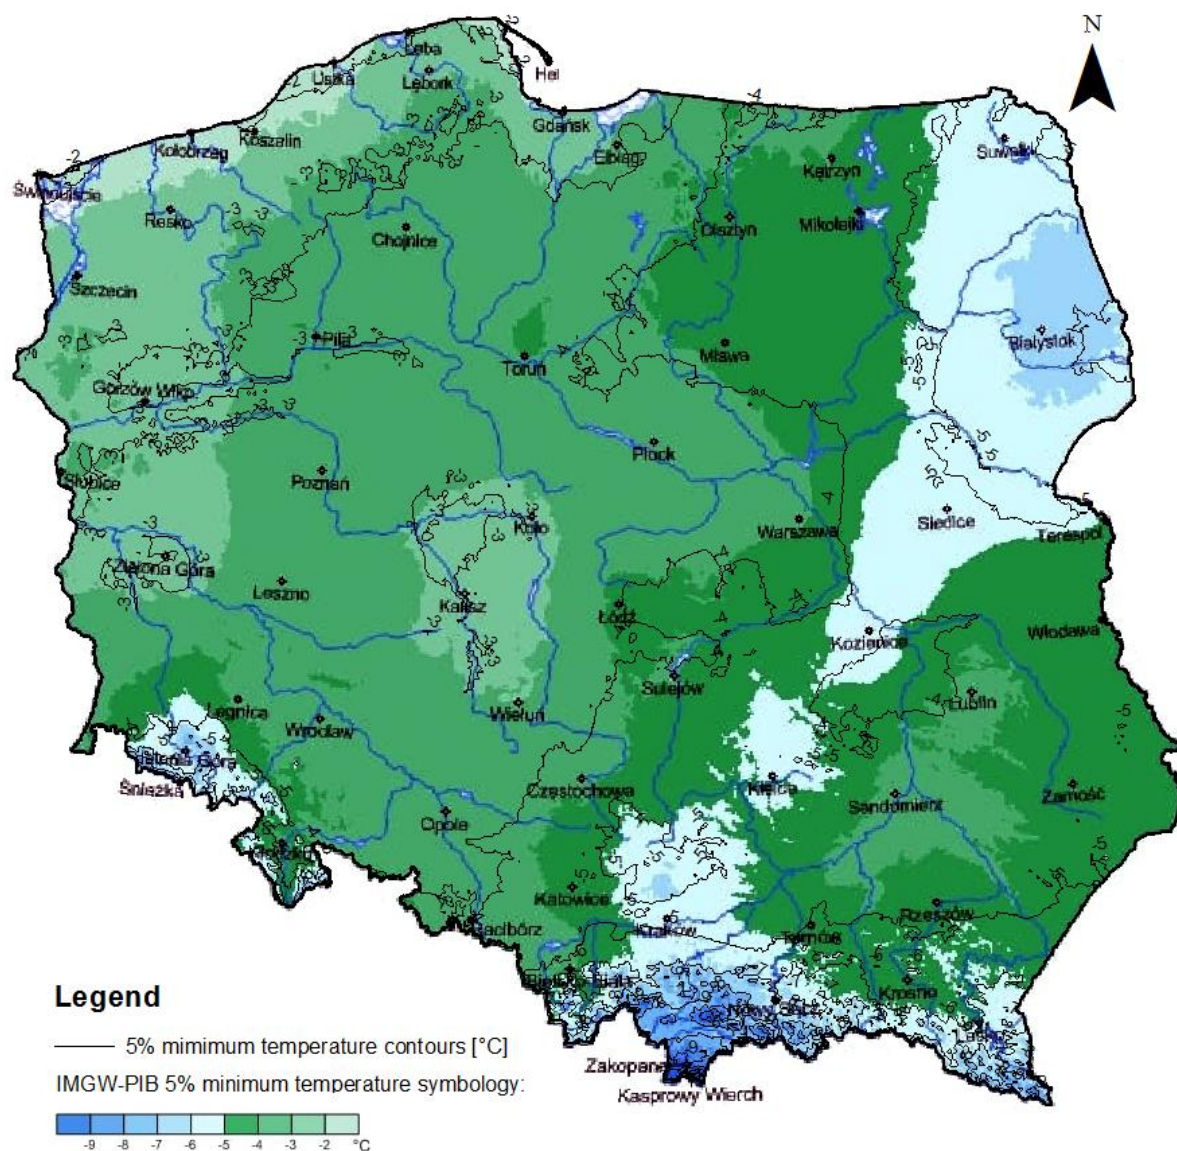

Figure S2. Comparison of the G2DC-PL+ 5<sup>th</sup> percentile minimum temperatures contours with the IMGW-PIB 5<sup>th</sup> percentile minimum temperatures map for 2015 (warm year). Contours are in 1 °C intervals. The IMGW-PIB map indicates also major rivers (blue lines) and major cities (labelled black circles). The IMGW-PIB map is adapted from the Climatic Maps of Poland.



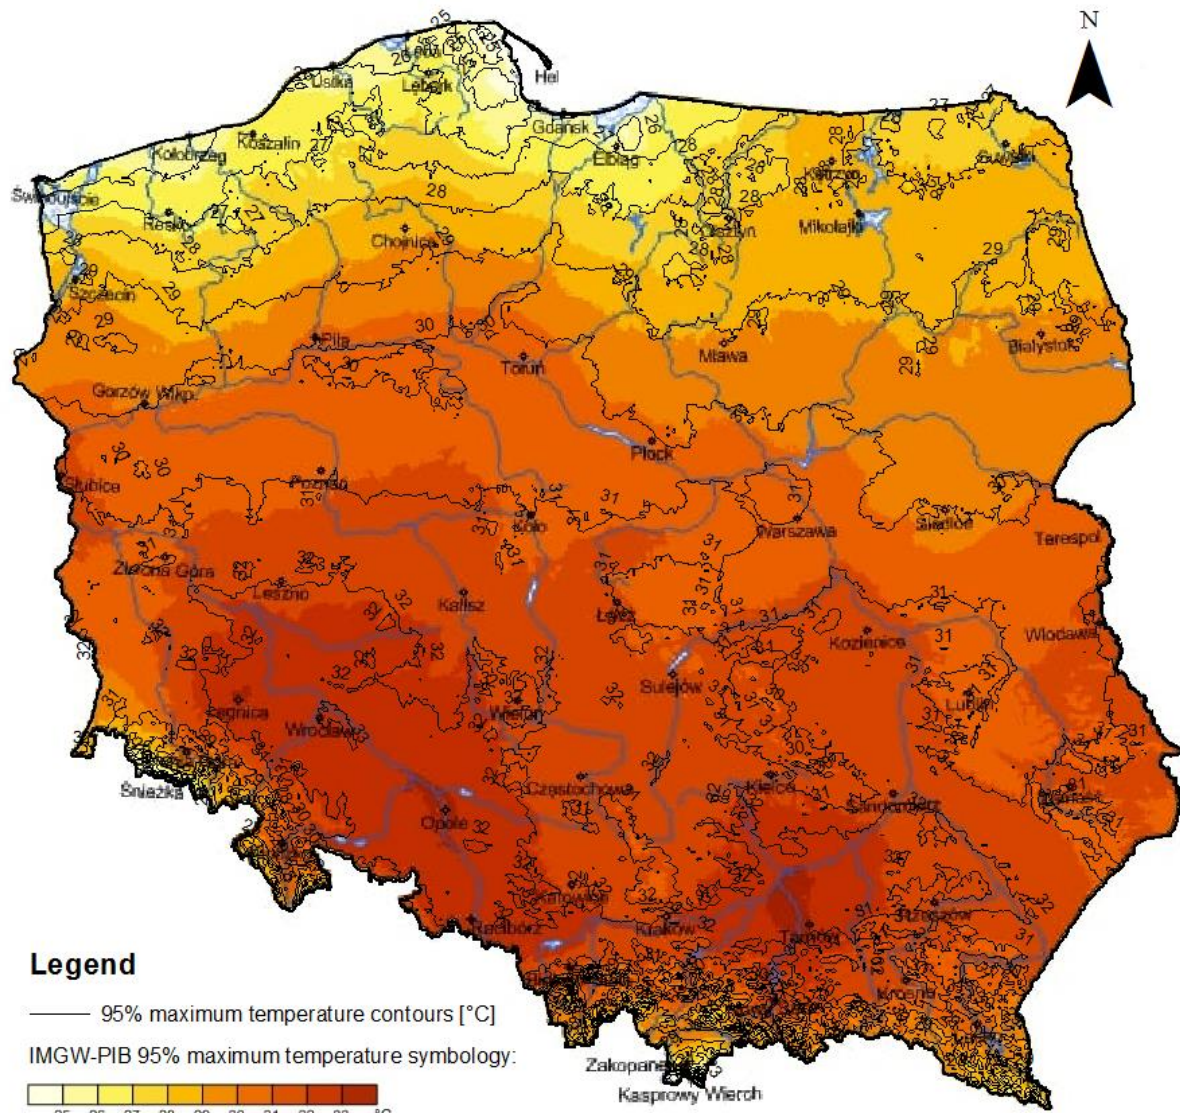

Figure S3. Comparison of the G2DC-PL+ 5<sup>th</sup> percentile maximum temperatures contours with the IMGW-PIB 5<sup>th</sup> percentile maximum temperatures map for 2015 (warm year). Contours are in 1 °C intervals. The IMGW-PIB map indicates also major rivers (blue lines) and major cities (labelled black circles). The IMGW-PIB map is adapted from the Climatic Maps of Poland.

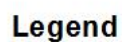

IMGW-PIB precipitation totals symbology:

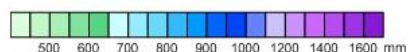

Figure S4. Comparison of the G2DC-PL+ mean annual precipitation contours with the IMGW-PIB mean annual precipitation map for 2017 (wet year). Contours are in 50 mm intervals. The IMGW-PIB map indicates also major rivers (blue lines) and major cities (labelled black circles). The IMGW-PIB map is adapted from the Climatic Maps of Poland.



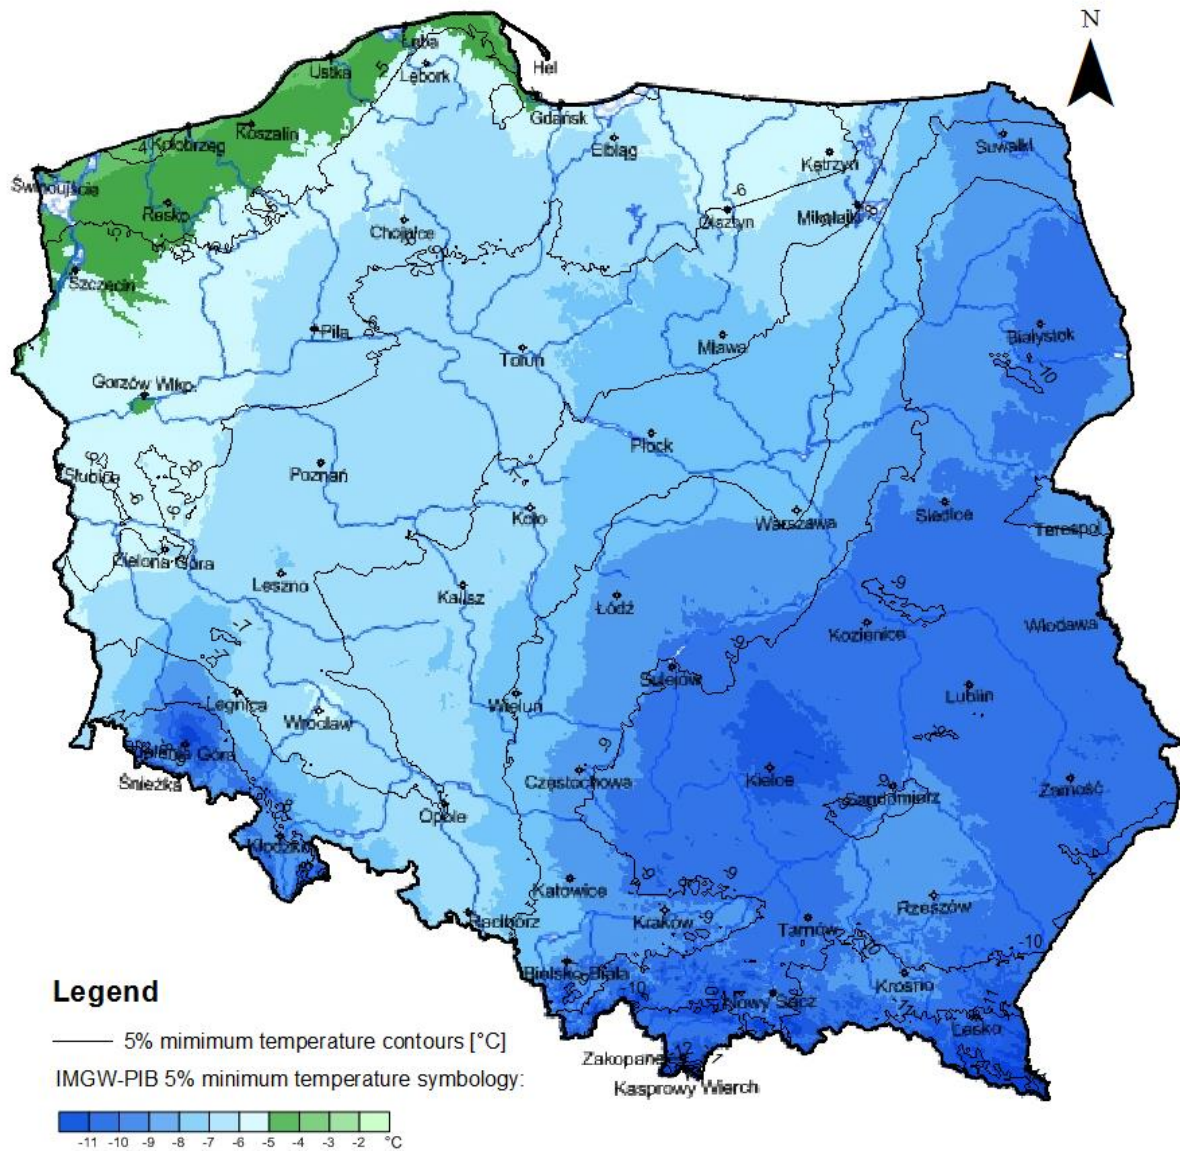

Figure S5. Comparison of the G2DC-PL+ 5<sup>th</sup> percentile minimum temperatures contours with the IMGW-PIB 5<sup>th</sup> percentile minimum temperatures map for 2017 (cool year). Contours are in 1 °C intervals. The IMGW-PIB map indicates also major rivers (blue lines) and major cities (labelled black circles). The IMGW-PIB map is adapted from the Climatic Maps of Poland.

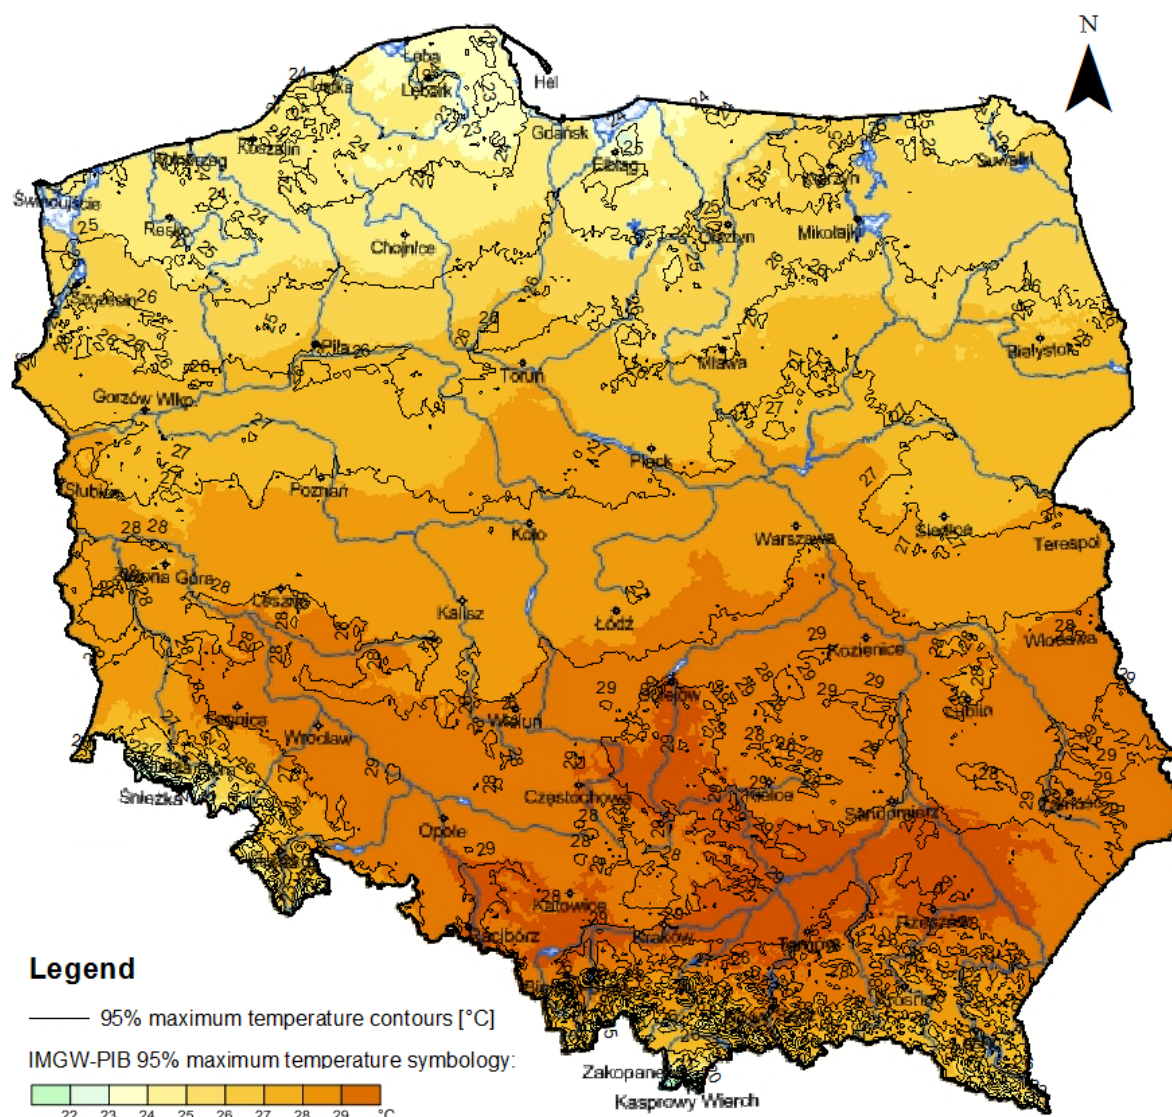

Figure S6. Comparison of the G2DC-PL+ 5<sup>th</sup> percentile maximum temperatures contours with the IMGW-PIB 5<sup>th</sup> percentile maximum temperatures map for 2017 (cool year). Contours are in 1 °C intervals. The IMGW-PIB map indicates also major rivers (blue lines) and major cities (labelled black circles). The IMGW-PIB map is adapted from the Climatic Maps of Poland.
